# Supplementary material for: Allium vegetable consumption and health: An umbrella review of meta‐analyses of multiple health outcomes
Source: PubMed Central journal article supplement (PMC6694434; doi:10.1002/fsn3.1117), 2019-07-10
Supplement: FSN3-7-2451-s001.pdf [file FSN3-7-2451-s001.pdf]

## Search strategies:

### PubMed:

History

[Download history](#) [Clear history](#)

| Search | Add to builder      | Query                                                                                                                      | Items found             | Time     |
|--------|---------------------|----------------------------------------------------------------------------------------------------------------------------|-------------------------|----------|
| #3     | <a href="#">Add</a> | Search (((meta-analys*) OR systematic review)) AND ((((((allium*) OR garlic*) OR onion*) OR shallot*) OR leek*) OR chive*) | <a href="#">18704</a>   | 21:29:21 |
| #2     | <a href="#">Add</a> | Search (meta-analys*) OR systematic review                                                                                 | <a href="#">2342840</a> | 21:28:29 |
| #1     | <a href="#">Add</a> | Search ((((((allium*) OR garlic*) OR onion*) OR shallot*) OR leek*) OR chive*                                              | <a href="#">35307</a>   | 21:27:53 |

### Web of Science:

| Set | Results                 |                                                                                                                                       | Combine Sets                                       | Delete Sets                |
|-----|-------------------------|---------------------------------------------------------------------------------------------------------------------------------------|----------------------------------------------------|----------------------------|
|     |                         | <a href="#">Save History</a> <a href="#">Open Saved History</a>                                                                       | <input type="radio"/> AND <input type="radio"/> OR | <a href="#">Select All</a> |
|     |                         |                                                                                                                                       | <a href="#">Combine</a>                            | <a href="#">Delete</a>     |
| # 9 | <a href="#">107</a>     | #8 AND #7<br><i>Databases=WOS, DIIDW, INSPEC, KJD, MEDLINE, RSCI, SCIELO Timespan=All years Search language=Auto</i>                  | <input type="checkbox"/>                           | <input type="checkbox"/>   |
| # 8 | <a href="#">110,676</a> | #6 OR #4 OR #3 OR #2 OR #1<br><i>Databases=WOS, DIIDW, INSPEC, KJD, MEDLINE, RSCI, SCIELO Timespan=All years Search language=Auto</i> | <input type="checkbox"/>                           | <input type="checkbox"/>   |
| # 7 | <a href="#">191,048</a> | TOPIC: (meta-analys*)<br><i>Databases=WOS, DIIDW, INSPEC, KJD, MEDLINE, RSCI, SCIELO Timespan=All years Search language=Auto</i>      | <input type="checkbox"/>                           | <input type="checkbox"/>   |
| # 6 | <a href="#">2,513</a>   | TOPIC: (chive*)<br><i>Databases=WOS, DIIDW, INSPEC, KJD, MEDLINE, RSCI, SCIELO Timespan=All years Search language=Auto</i>            | <input type="checkbox"/>                           | <input type="checkbox"/>   |
| # 5 | <a href="#">7,481</a>   | TOPIC: (leek*)<br><i>Databases=WOS, DIIDW, INSPEC, KJD, MEDLINE, RSCI, SCIELO Timespan=All years Search language=Auto</i>             | <input type="checkbox"/>                           | <input type="checkbox"/>   |
| # 4 | <a href="#">3,647</a>   | TOPIC: (shallot*)<br><i>Databases=WOS, DIIDW, INSPEC, KJD, MEDLINE, RSCI, SCIELO Timespan=All years Search language=Auto</i>          | <input type="checkbox"/>                           | <input type="checkbox"/>   |
| # 3 | <a href="#">60,390</a>  | TOPIC: (onion*)<br><i>Databases=WOS, DIIDW, INSPEC, KJD, MEDLINE, RSCI, SCIELO Timespan=All years Search language=Auto</i>            | <input type="checkbox"/>                           | <input type="checkbox"/>   |
| # 2 | <a href="#">49,727</a>  | TOPIC: (garlic*)<br><i>Databases=WOS, DIIDW, INSPEC, KJD, MEDLINE, RSCI, SCIELO Timespan=All years Search language=Auto</i>           | <input type="checkbox"/>                           | <input type="checkbox"/>   |
| # 1 | <a href="#">28,179</a>  | TOPIC: (allium*)<br><i>Databases=WOS, DIIDW, INSPEC, KJD, MEDLINE, RSCI, SCIELO Timespan=All years Search language=Auto</i>           | <input type="checkbox"/>                           | <input type="checkbox"/>   |

### Embase:

| ▼ Search History (3)     |                                                                     |         |          | <a href="#">View Saved</a>                             | <a href="#">⋮</a> |
|--------------------------|---------------------------------------------------------------------|---------|----------|--------------------------------------------------------|-------------------|
| # ▲                      | Searches                                                            | Results | Type     | Actions                                                | Annotations       |
| <input type="checkbox"/> | 1 (allium* or garlic* or onion* or chive* or shallot* or leek*).af. | 24013   | Advanced | <a href="#">Display Results</a> <a href="#">More ▼</a> | <a href="#">🗉</a> |
| <input type="checkbox"/> | 2 (systematic review or meta-analys*).af.                           | 376909  | Advanced | <a href="#">Display Results</a> <a href="#">More ▼</a> | <a href="#">🗉</a> |
| <input type="checkbox"/> | 3 1 and 2                                                           | 432     | Advanced | <a href="#">Display Results</a> <a href="#">More ▼</a> | <a href="#">🗉</a> |

[Save](#) [Remove](#) Combine with: [AND](#) [OR](#)

[Save All](#) [Edit](#) [Create RSS](#) [View Saved](#)

## Cochrane Library:

|   |                        |                        |              |
|---|------------------------|------------------------|--------------|
| - | Title Abstract Keyword | allium*                |              |
| - | OR                     | Title Abstract Keyword | garlic*      |
| - | OR                     | Title Abstract Keyword | onion*       |
| - | OR                     | Title Abstract Keyword | shallot*     |
| - | AND                    | Title Abstract Keyword | meta-analys* |

(Word variations have been searched)

Search limits

Send to search manager

Run search

Clear all

Cochrane Reviews  
6

Cochrane Protocols  
1

Trials  
581

Editorials  
0

Special collections  
0

Clinical Answers  
0

More  
▼
